# Supplementary material
Source: PubMed Central journal article supplement (PMC4251534)

## **Steroidal Alkaloids from the Marine Sponge *Corticium niger* that Inhibit Growth of Human Colon Carcinoma Cells**

Suthananda N. Sunassee,<sup>†</sup> Tanya Ransom,<sup>†</sup> Curtis J. Heinrich,<sup>†,‡</sup> John A. Beutler,<sup>†</sup> David G. Covell,<sup>§</sup> James B. McMahon,<sup>†</sup> and Kirk R. Gustafson<sup>\*,†</sup>

<sup>†</sup>*Molecular Targets laboratory, Center for Cancer Research, National Cancer Institute, Frederick, Maryland 21702, United States; <sup>‡</sup>Basic Science Program, Leidos Biomedical Research, Inc., Frederick National Laboratory for Cancer Research, Frederick, Maryland 21702-1201, United States; <sup>§</sup>Screening Technologies Branch, Division of Cancer Treatment and Diagnosis, National Cancer Institute, Frederick, Maryland 21702-1201, United States*

### **Supporting Information**

**S1** Plakinamine N (1) <sup>1</sup>H NMR (600 MHz, CD<sub>3</sub>OD)

**S2** Plakinamine N (1) <sup>13</sup>C NMR (150 MHz, CD<sub>3</sub>OD)

**S3** Plakinamine N (1) gCOSY (CD<sub>3</sub>OD)

**S4** Plakinamine N (1) gHSQC (CD<sub>3</sub>OD)

**S5** Plakinamine N (1) gHMBC (CD<sub>3</sub>OD)

**S6** Plakinamine N (1) ROESY (CD<sub>3</sub>OD)

**S7** Plakinamine N (1) HRESIMS (+)

**S8** Plakinamine O (2) <sup>1</sup>H NMR (600 MHz, CD<sub>3</sub>OD)

**S9** Plakinamine O (2) <sup>13</sup>C NMR (150 MHz, CD<sub>3</sub>OD)

**S10** Plakinamine O (2) gCOSY (CD<sub>3</sub>OD)

**S11** Plakinamine O (2) gHSQC (CD<sub>3</sub>OD)

**S12** Plakinamine O (2) gHMBC (CD<sub>3</sub>OD)

**S13** Plakinamine O (2) ROESY (CD<sub>3</sub>OD)

**S14** Plakinamine O (2) HRESIMS (+)

**S15** Plakinamine N (1) NCI-60 mean bar graphs

**S16** Plakinamine O (2) NCI-60 mean bar graphs

**S17** Plakinamine J (4) NCI-60 mean bar graphs

S1 Plakinamine N (1) <sup>1</sup>H NMR (600 MHz, CD<sub>3</sub>OD)

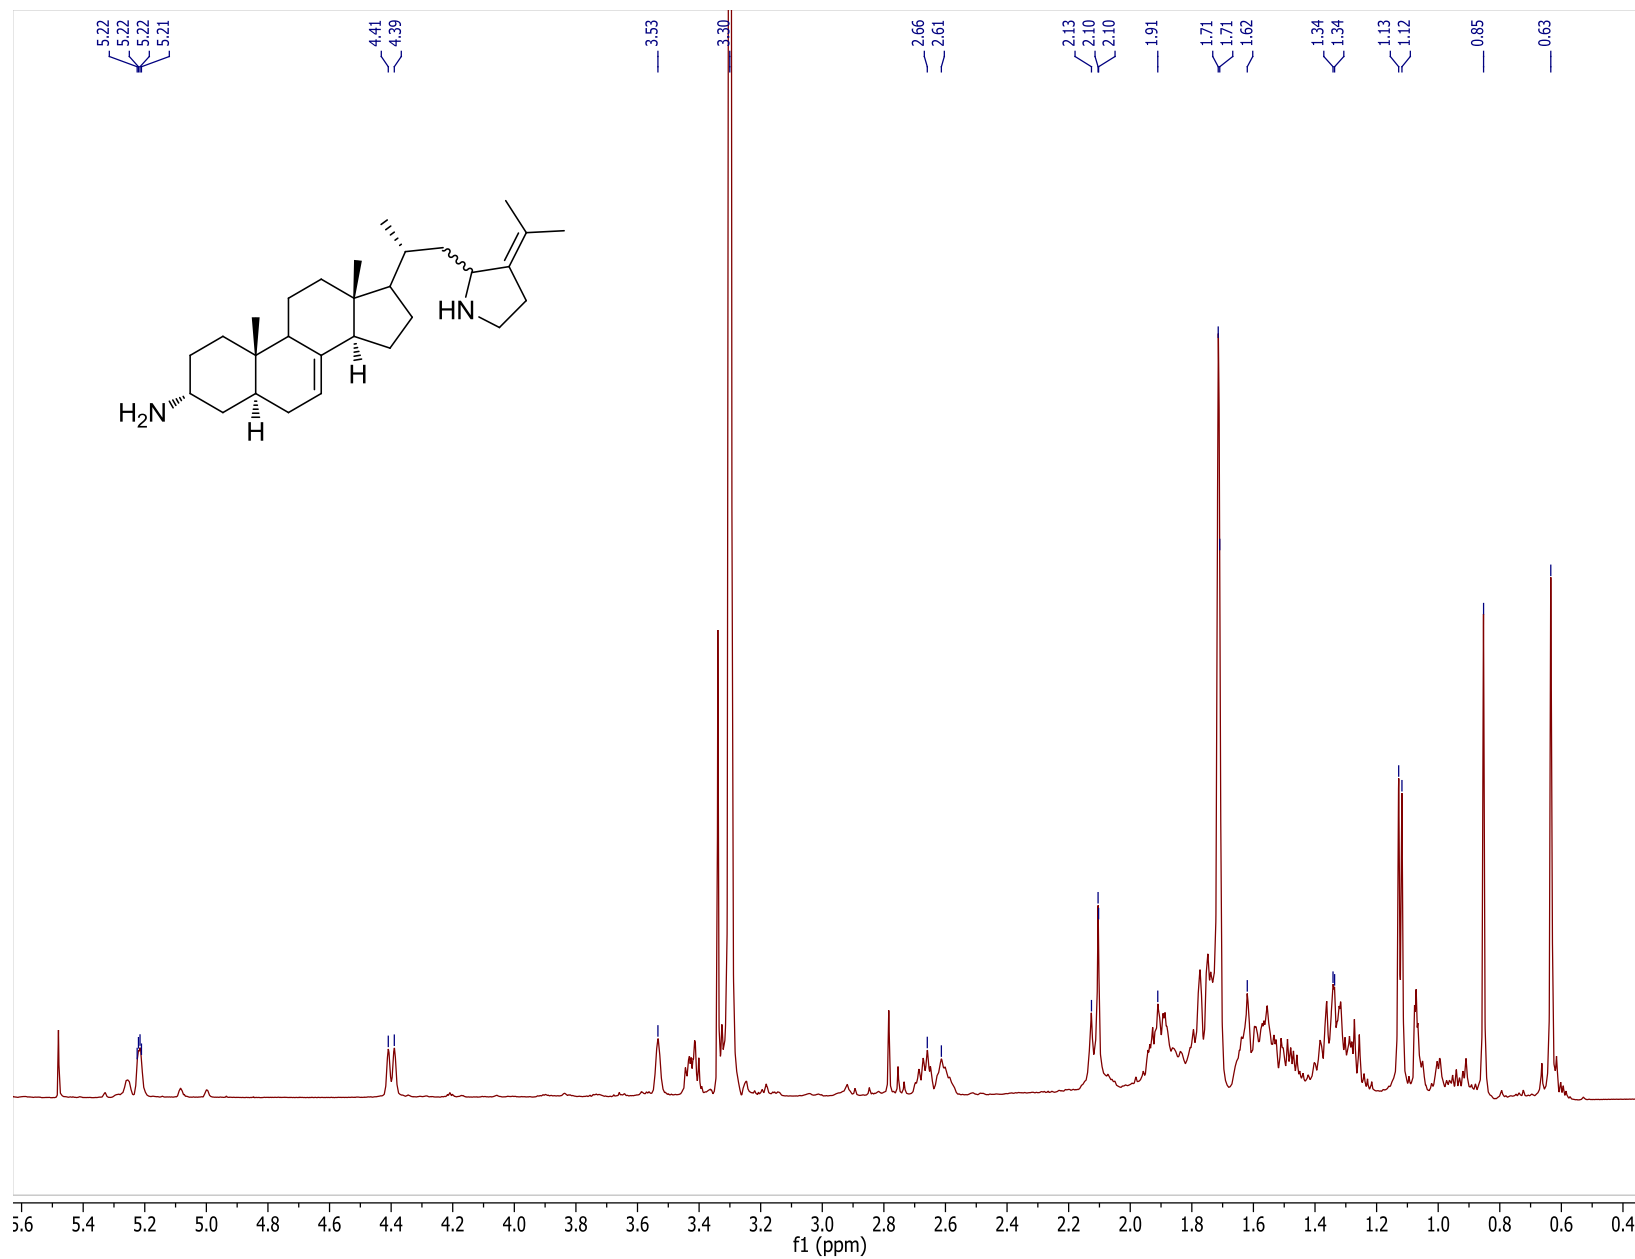

S2 Plakinamine N (1) <sup>13</sup>C NMR (150MHz, CD<sub>3</sub>OD)

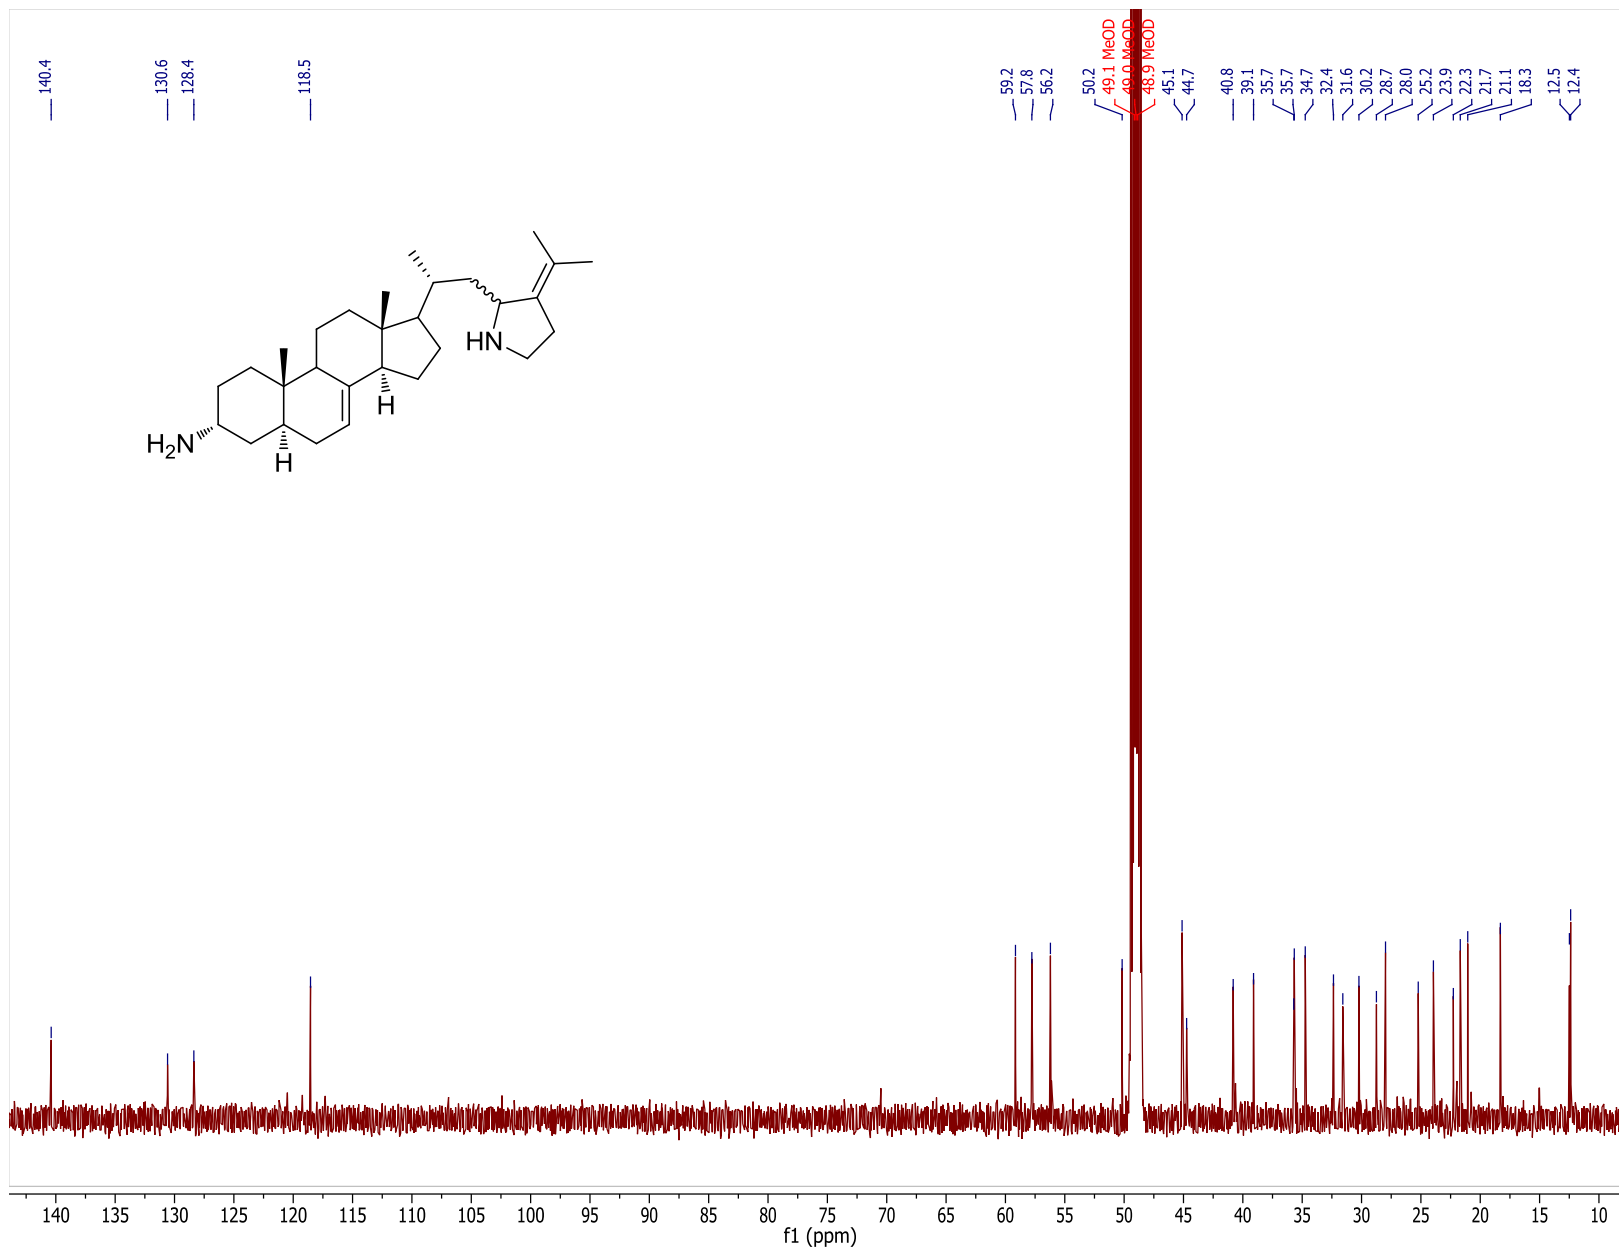

S3 Plakinamine N (1) gCOSY (CD<sub>3</sub>OD)

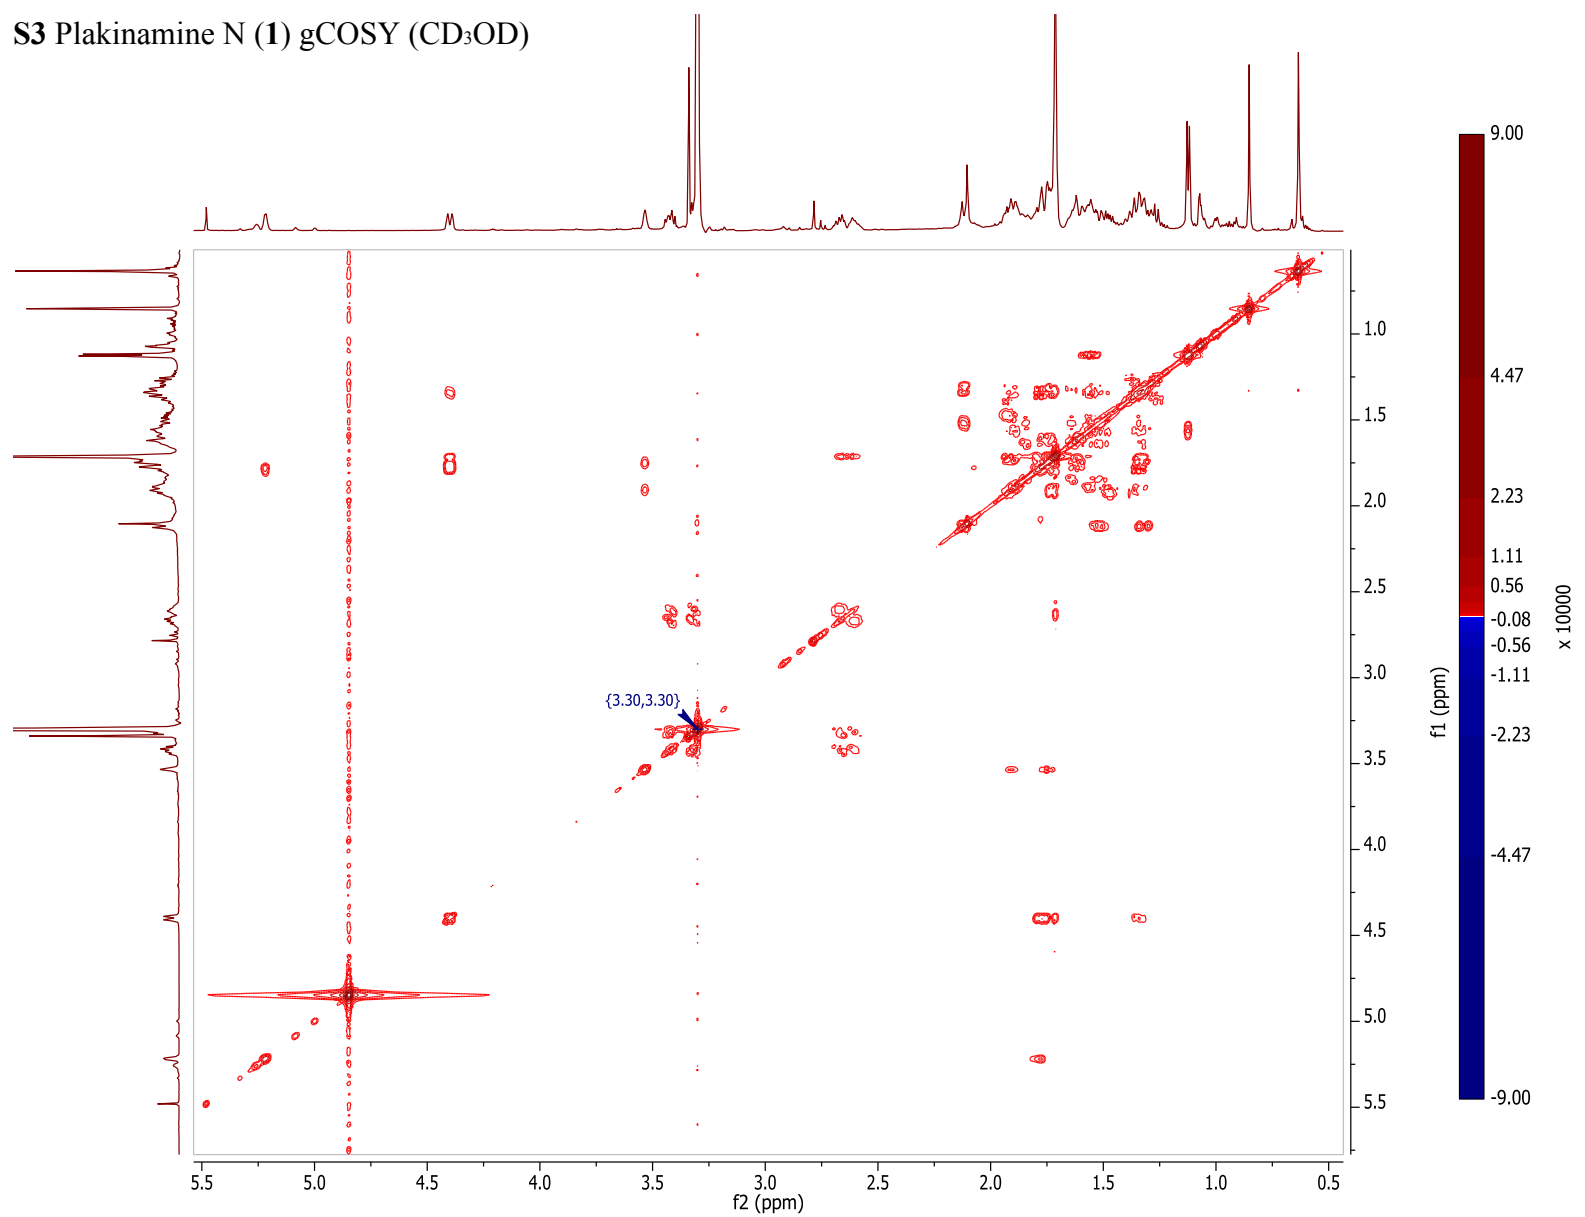

S4 Plakinamine N (1) gHSQC (CD<sub>3</sub>OD)

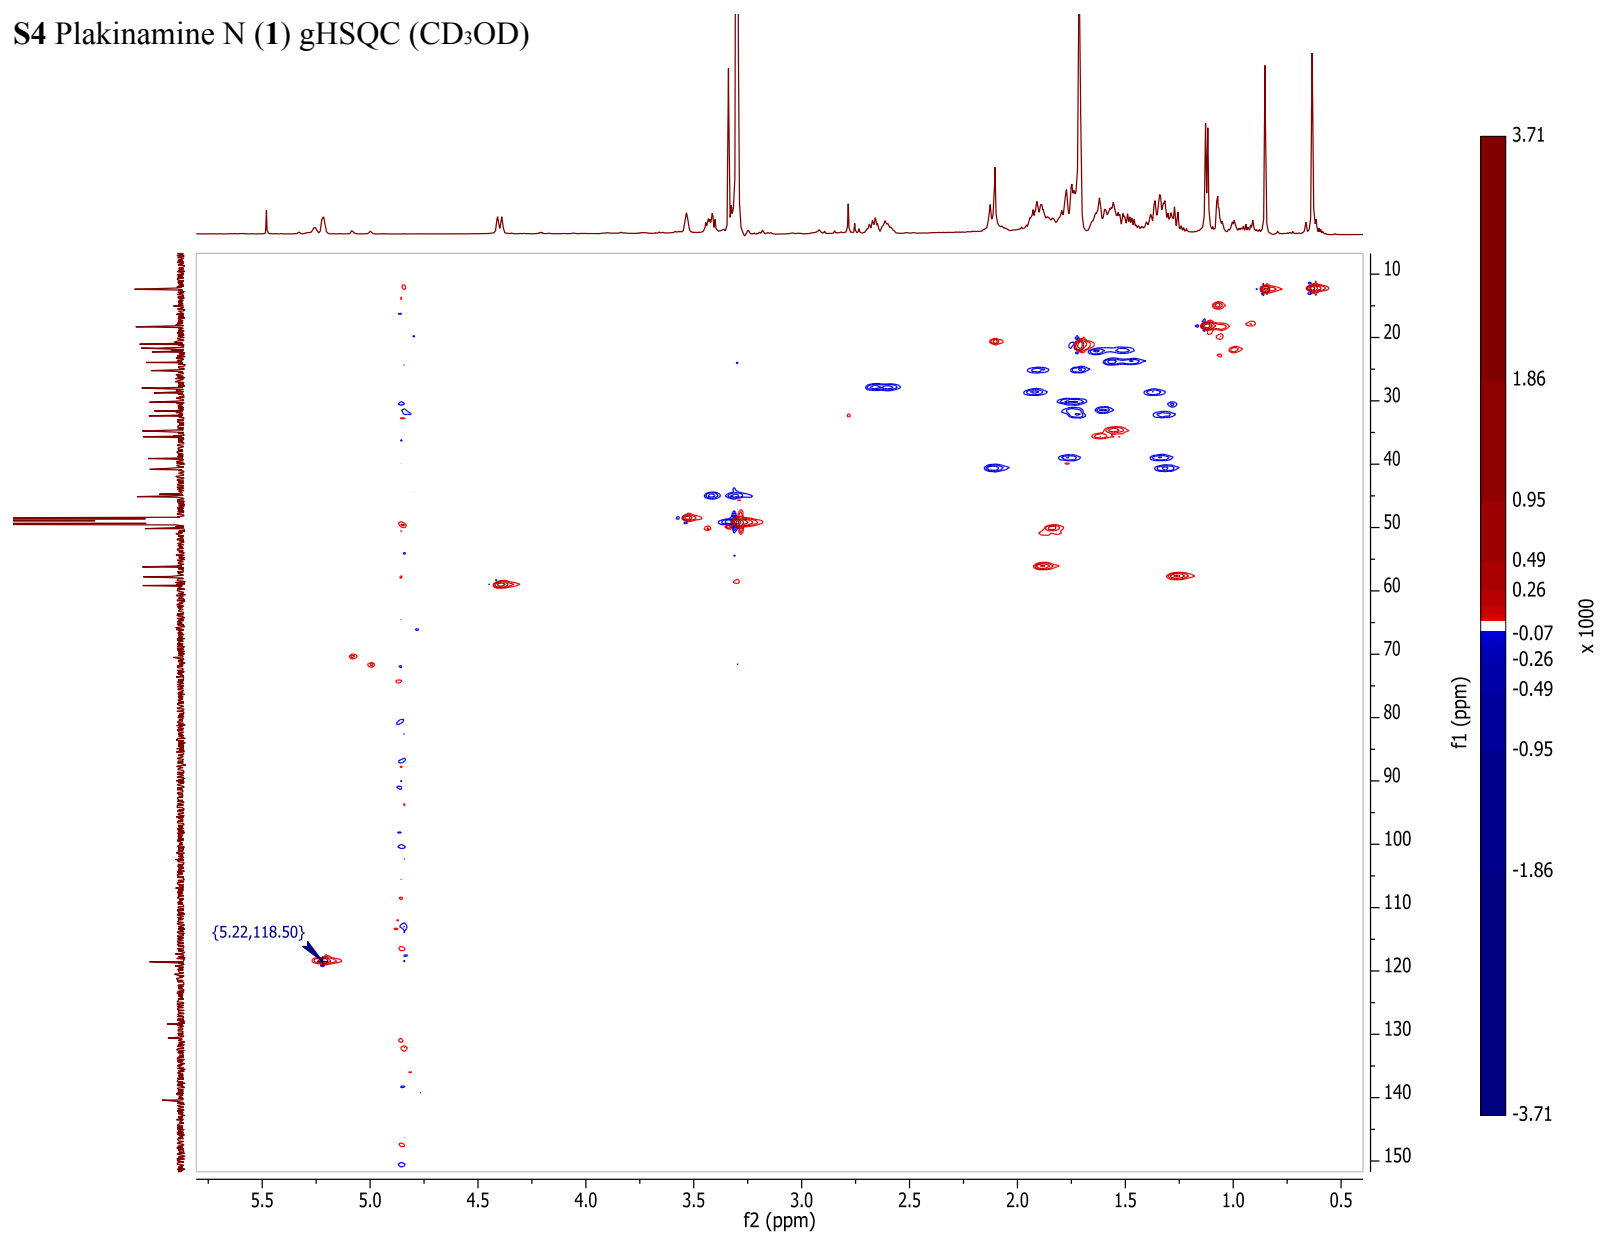

S5 Plakinamine N (1) gHMBC (CD<sub>3</sub>OD)

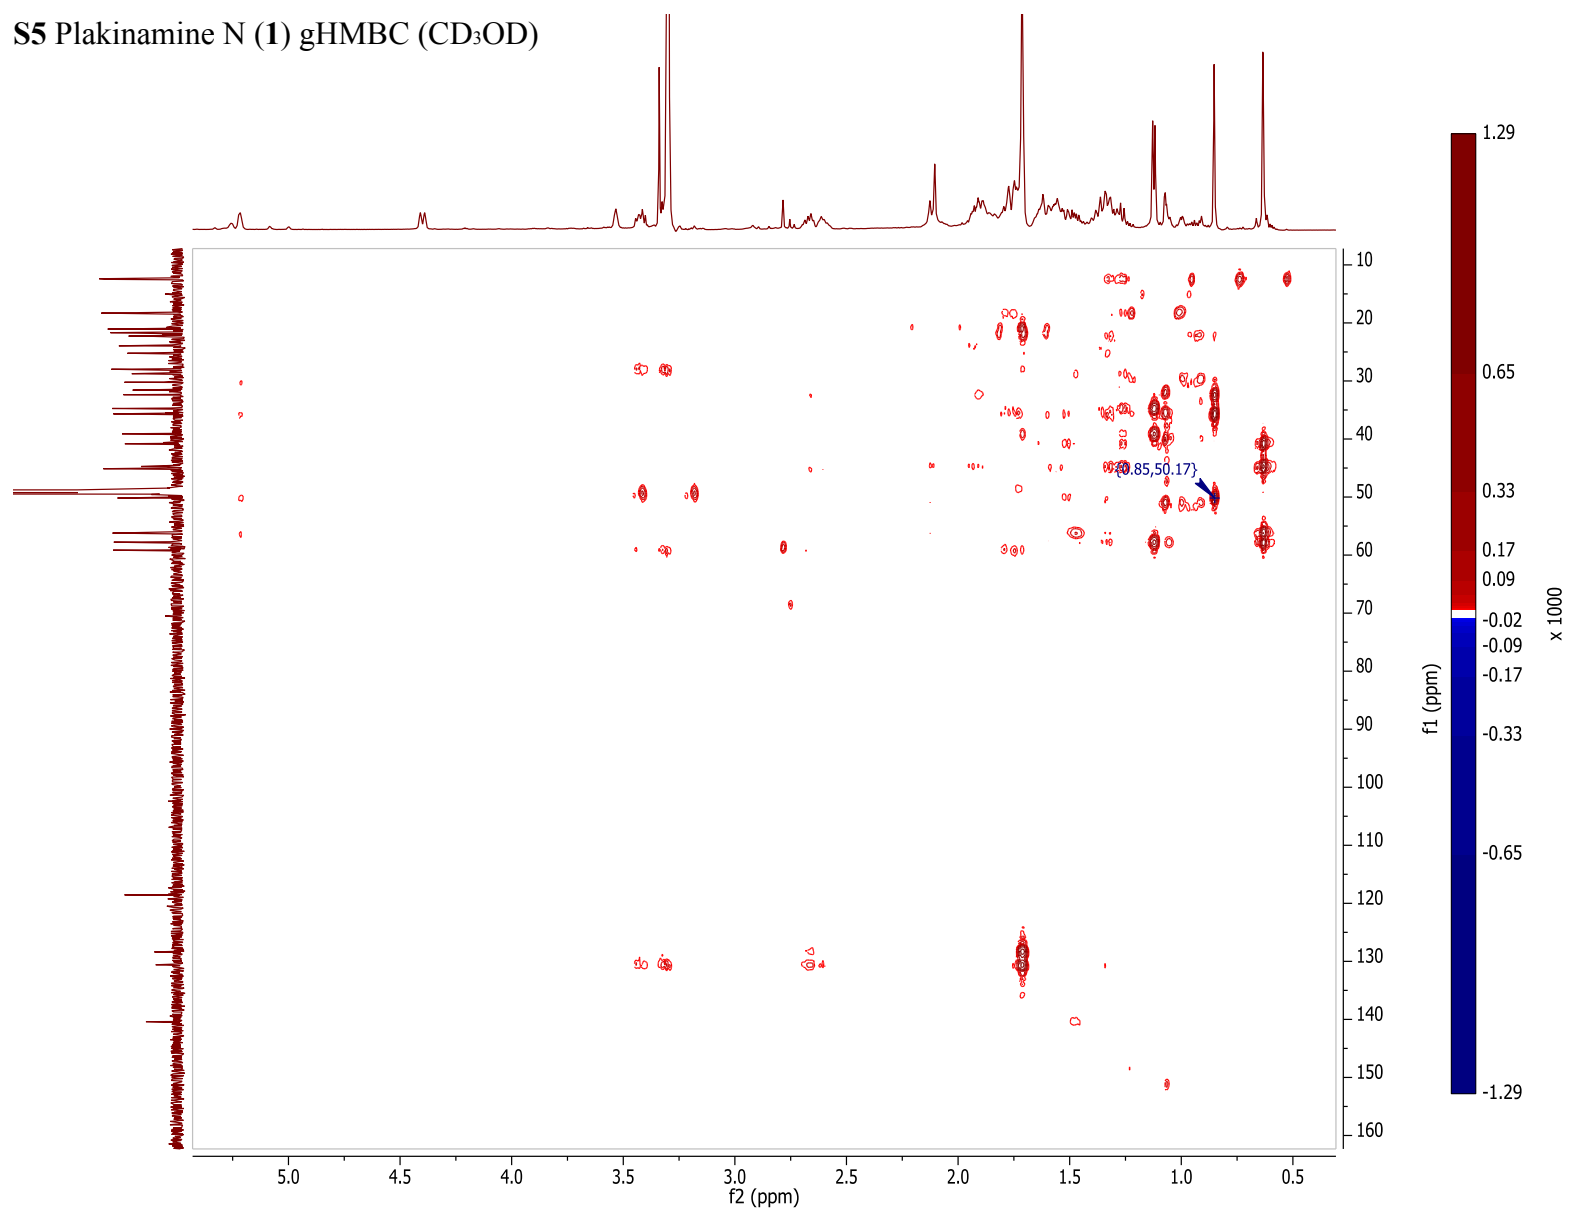

S6 Plakinamine N (1) ROESY (CD<sub>3</sub>OD)

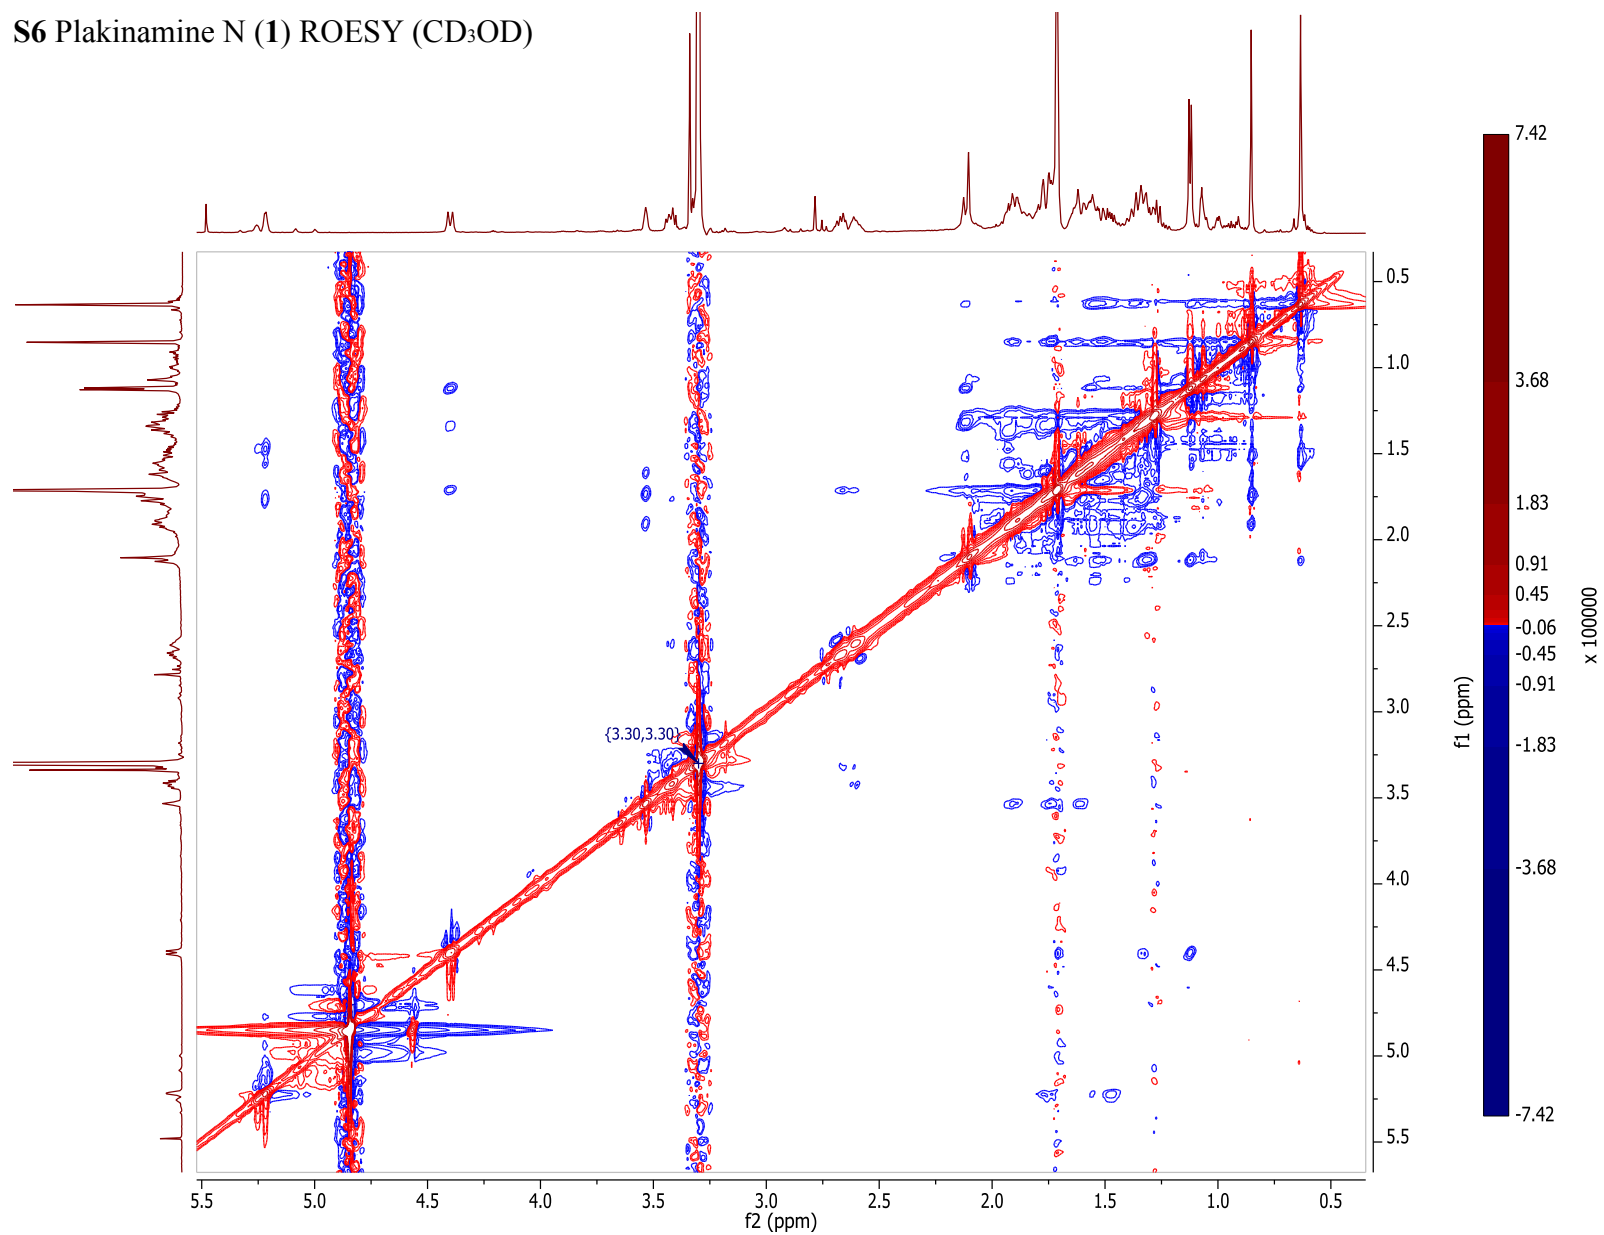

# S7 Plakinamine N (1) HRESIMS (+)

## MS Formula Results: + Scan (3.276 min) (155A125A.d)

| m/z      | Ion                | Formula                                        | Abundance |
|----------|--------------------|------------------------------------------------|-----------|
| 425.3903 | (M+H) <sup>+</sup> | C <sub>29</sub> H <sub>49</sub> N <sub>2</sub> | 362242.6  |

  

| Best | Formula (M)                                      | Ion Formula                                      | Score | Cross Score | Calc m/z | Diff (ppm) | Mass Match | Abund Match | Spacing Match |
|------|--------------------------------------------------|--------------------------------------------------|-------|-------------|----------|------------|------------|-------------|---------------|
| ✓    | C <sub>29</sub> H <sub>48</sub> N <sub>2</sub>   | C <sub>29</sub> H <sub>49</sub> N <sub>2</sub>   | 94.16 |             | 425.389  | -2.99      | 91.95      | 99.47       | 92.21         |
|      | C <sub>26</sub> H <sub>52</sub> N <sub>2</sub> S | C <sub>26</sub> H <sub>53</sub> N <sub>2</sub> S | 82.57 |             | 425.3924 | 4.94       | 79.53      | 82.42       | 88.81         |

## User Spectra

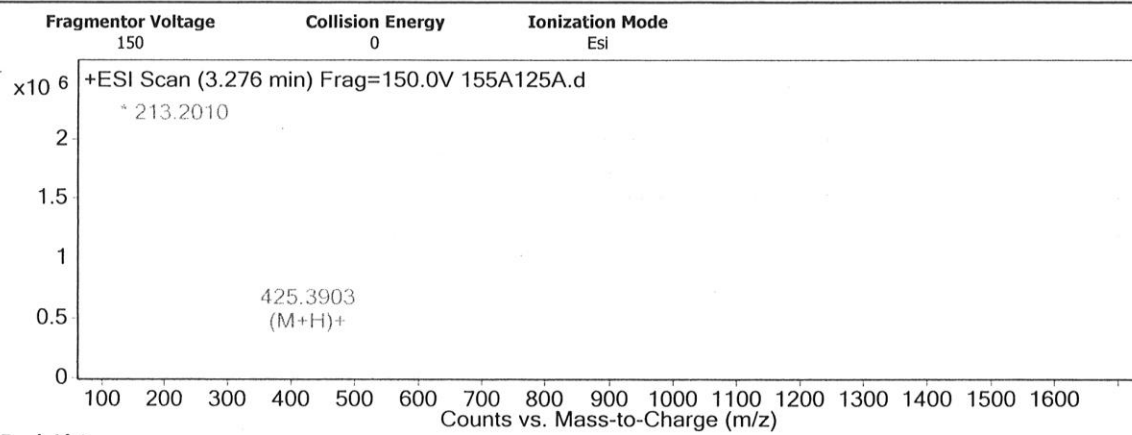



S8 Plakinamine O (2) <sup>1</sup>H NMR (600 MHz, CD<sub>3</sub>OD)

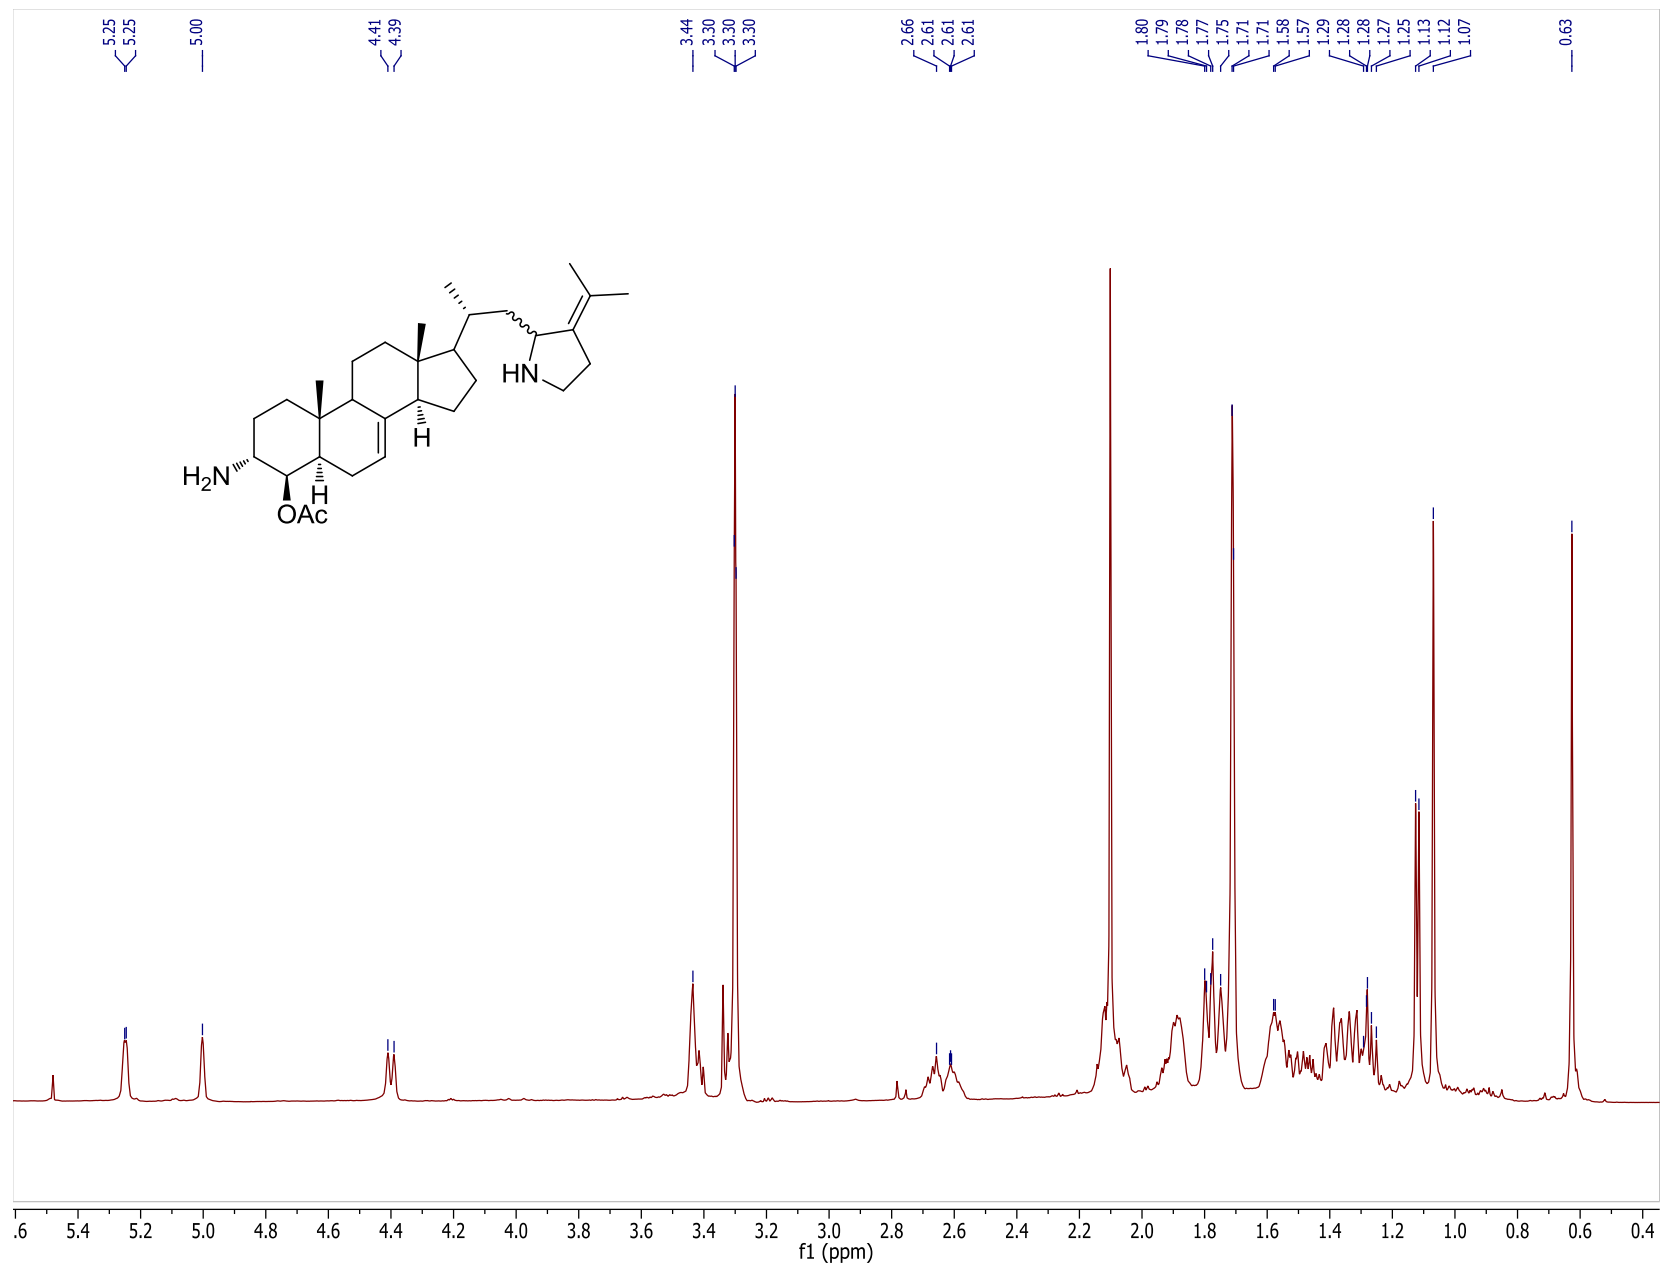

S9 Plakinamine O (2) <sup>13</sup>C NMR (150 MHz, CD<sub>3</sub>OD)

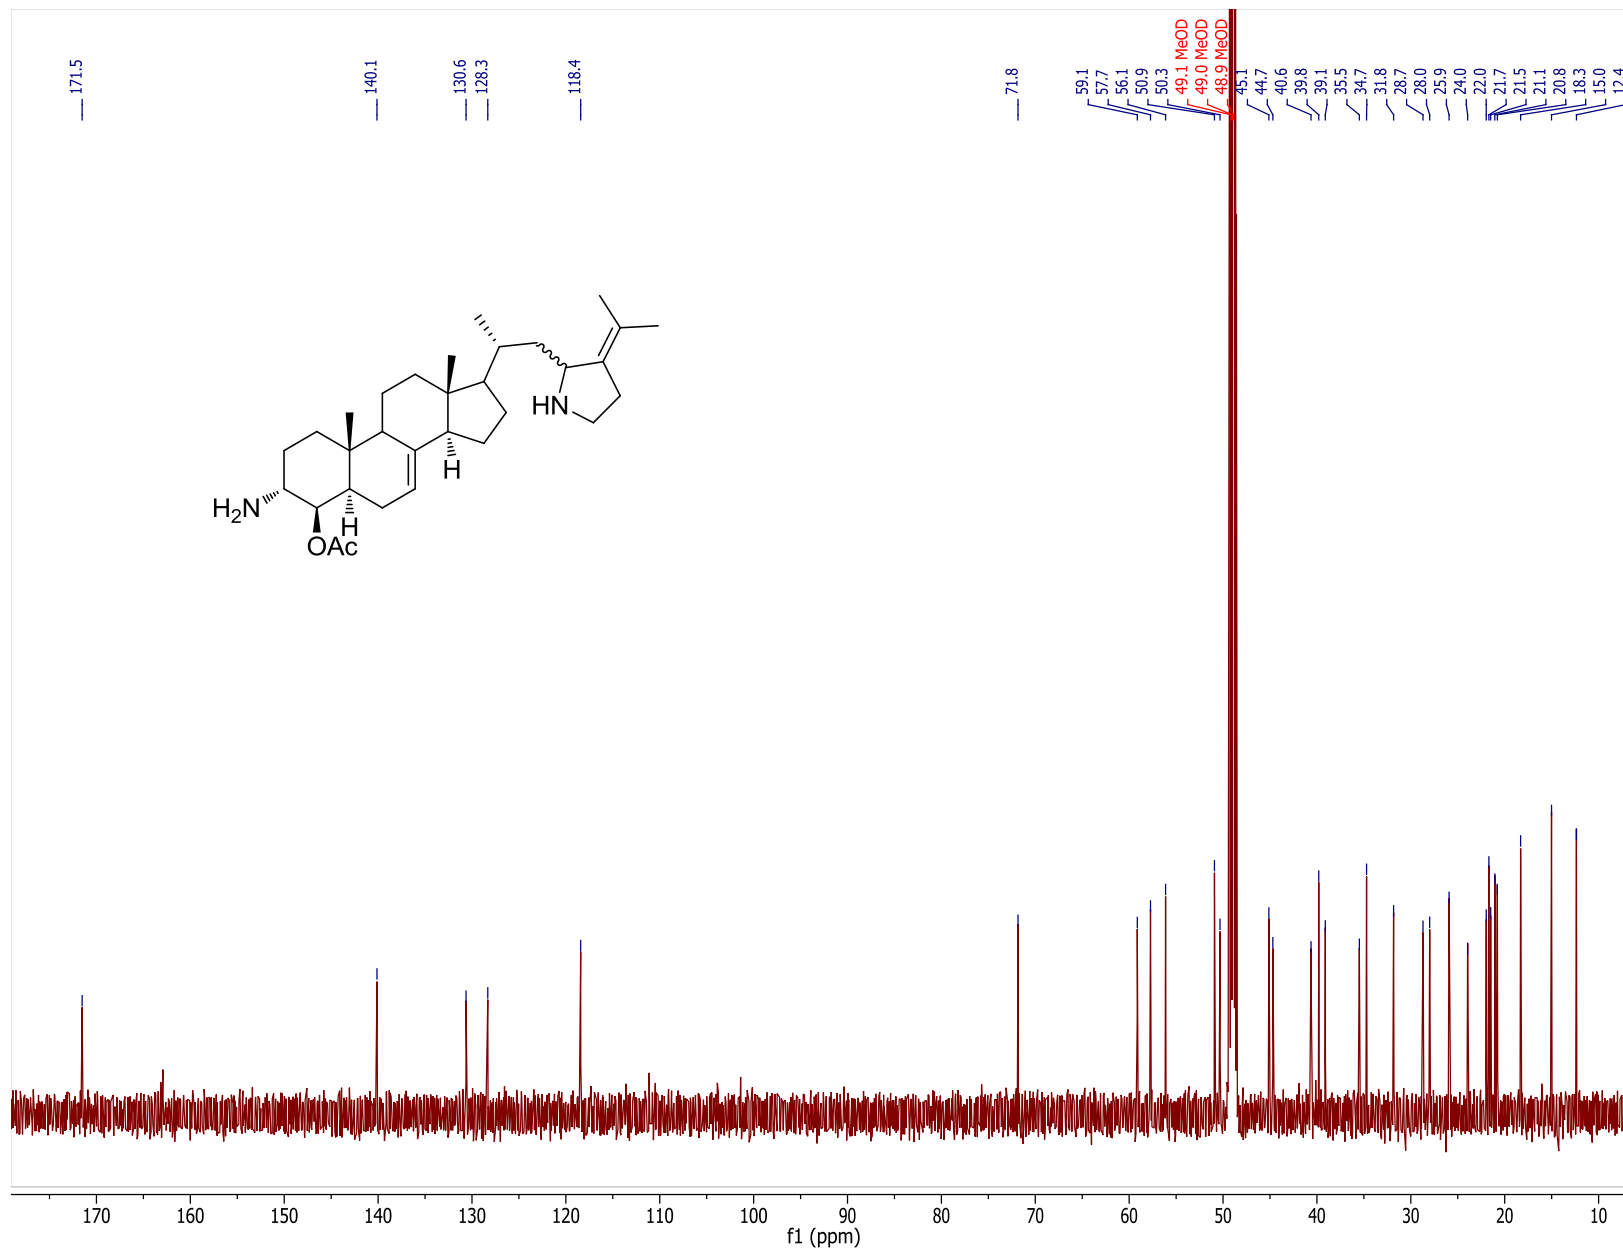

S10 Plakinamine O (2) gCOSY (CD<sub>3</sub>OD)

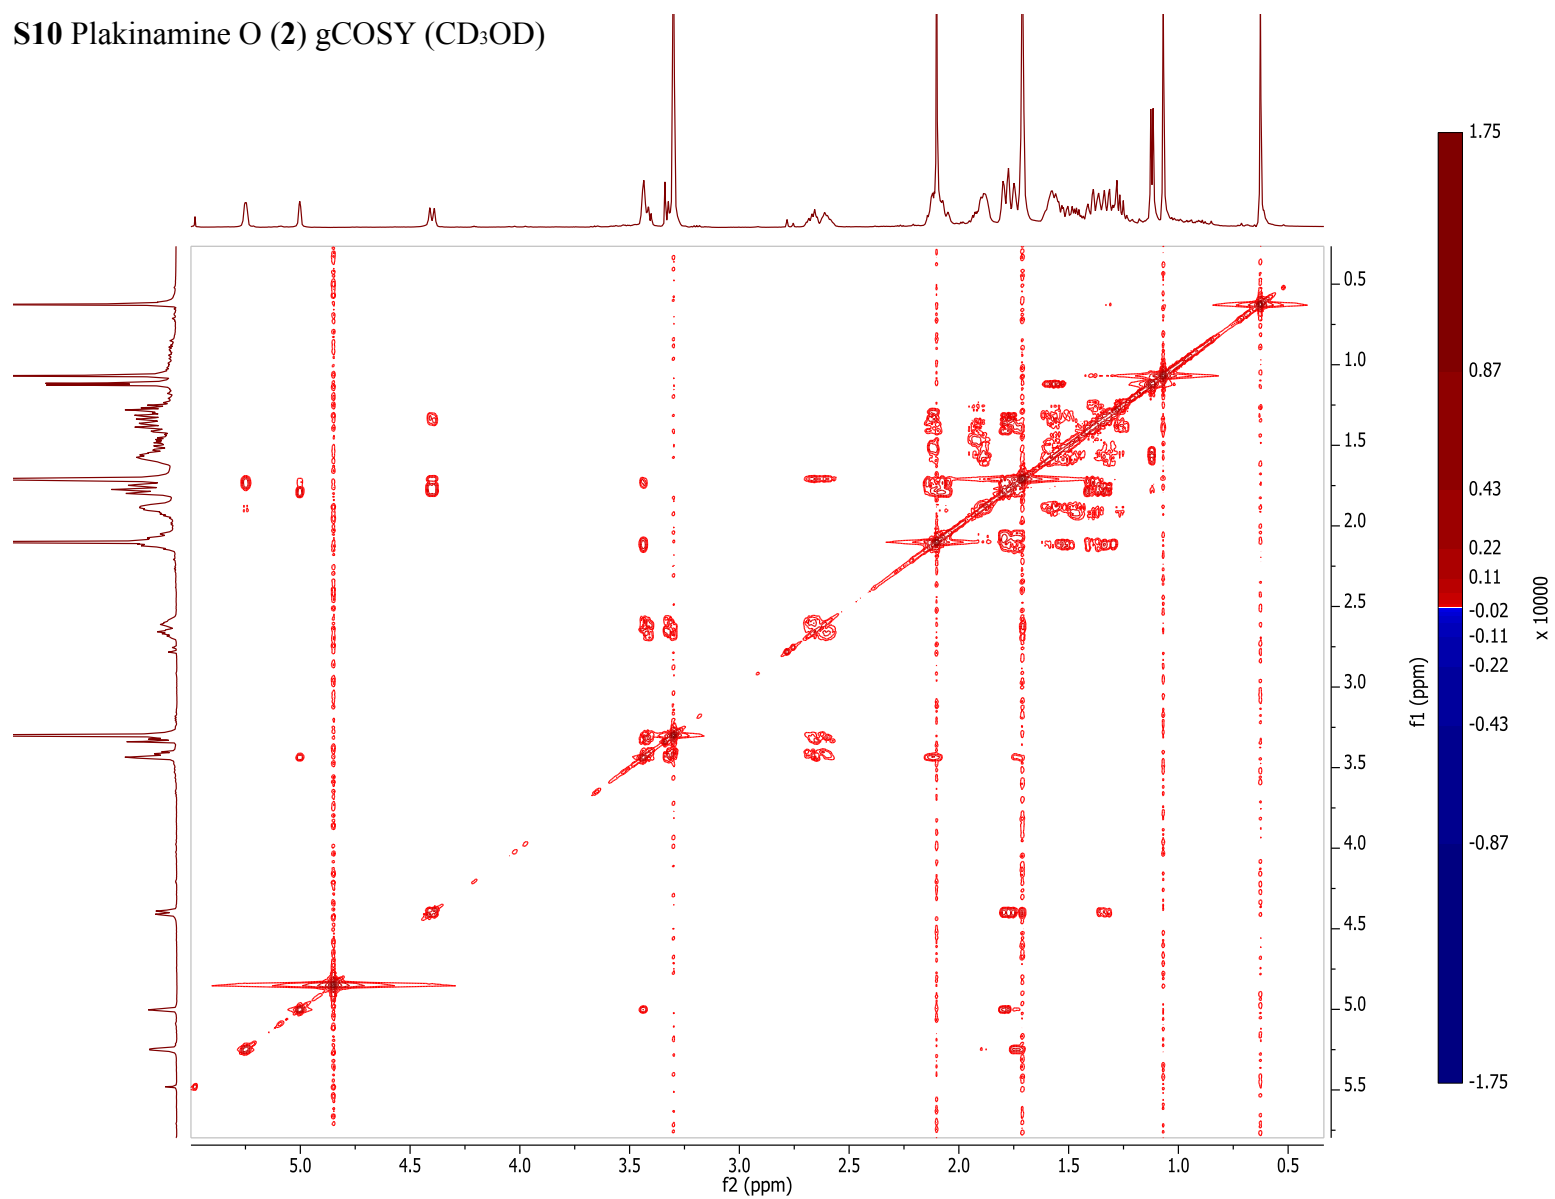

S11 Plakinamine O (2) gHSQC (CD<sub>3</sub>OD)

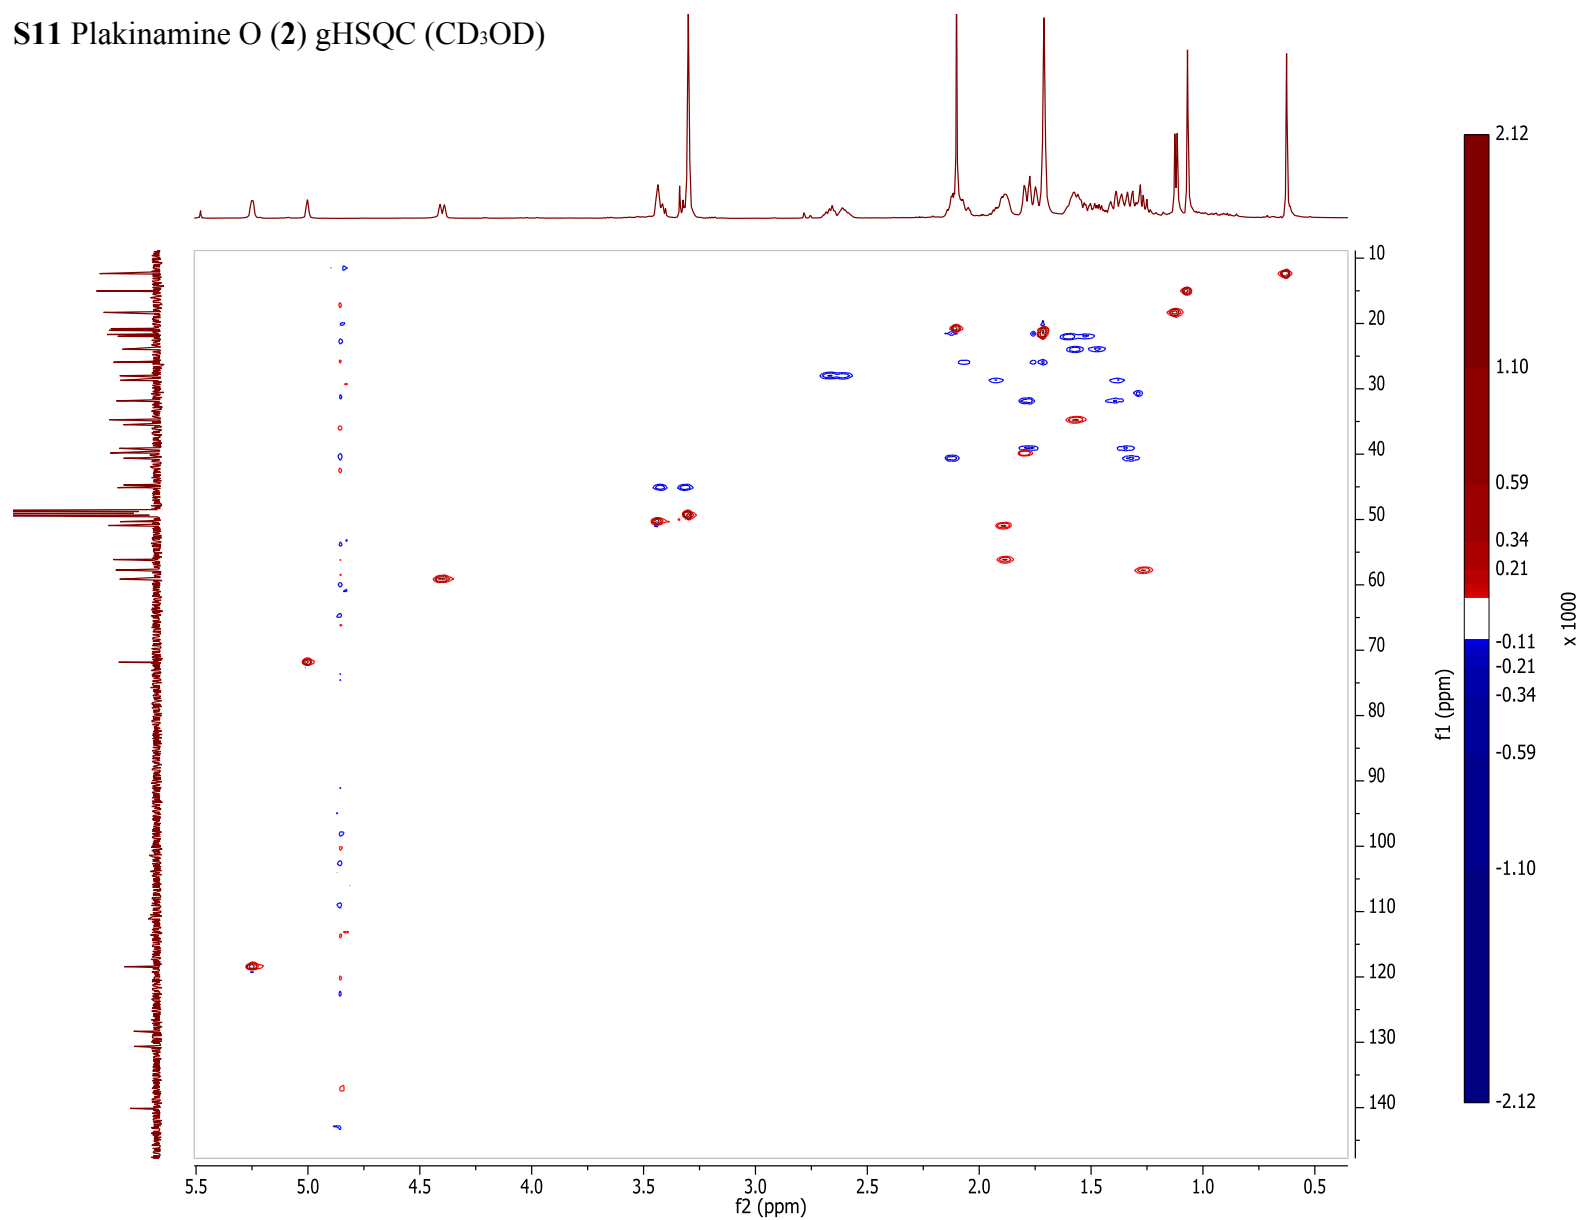

S12 Plakinamine O (2) gHMBC (CD<sub>3</sub>OD)

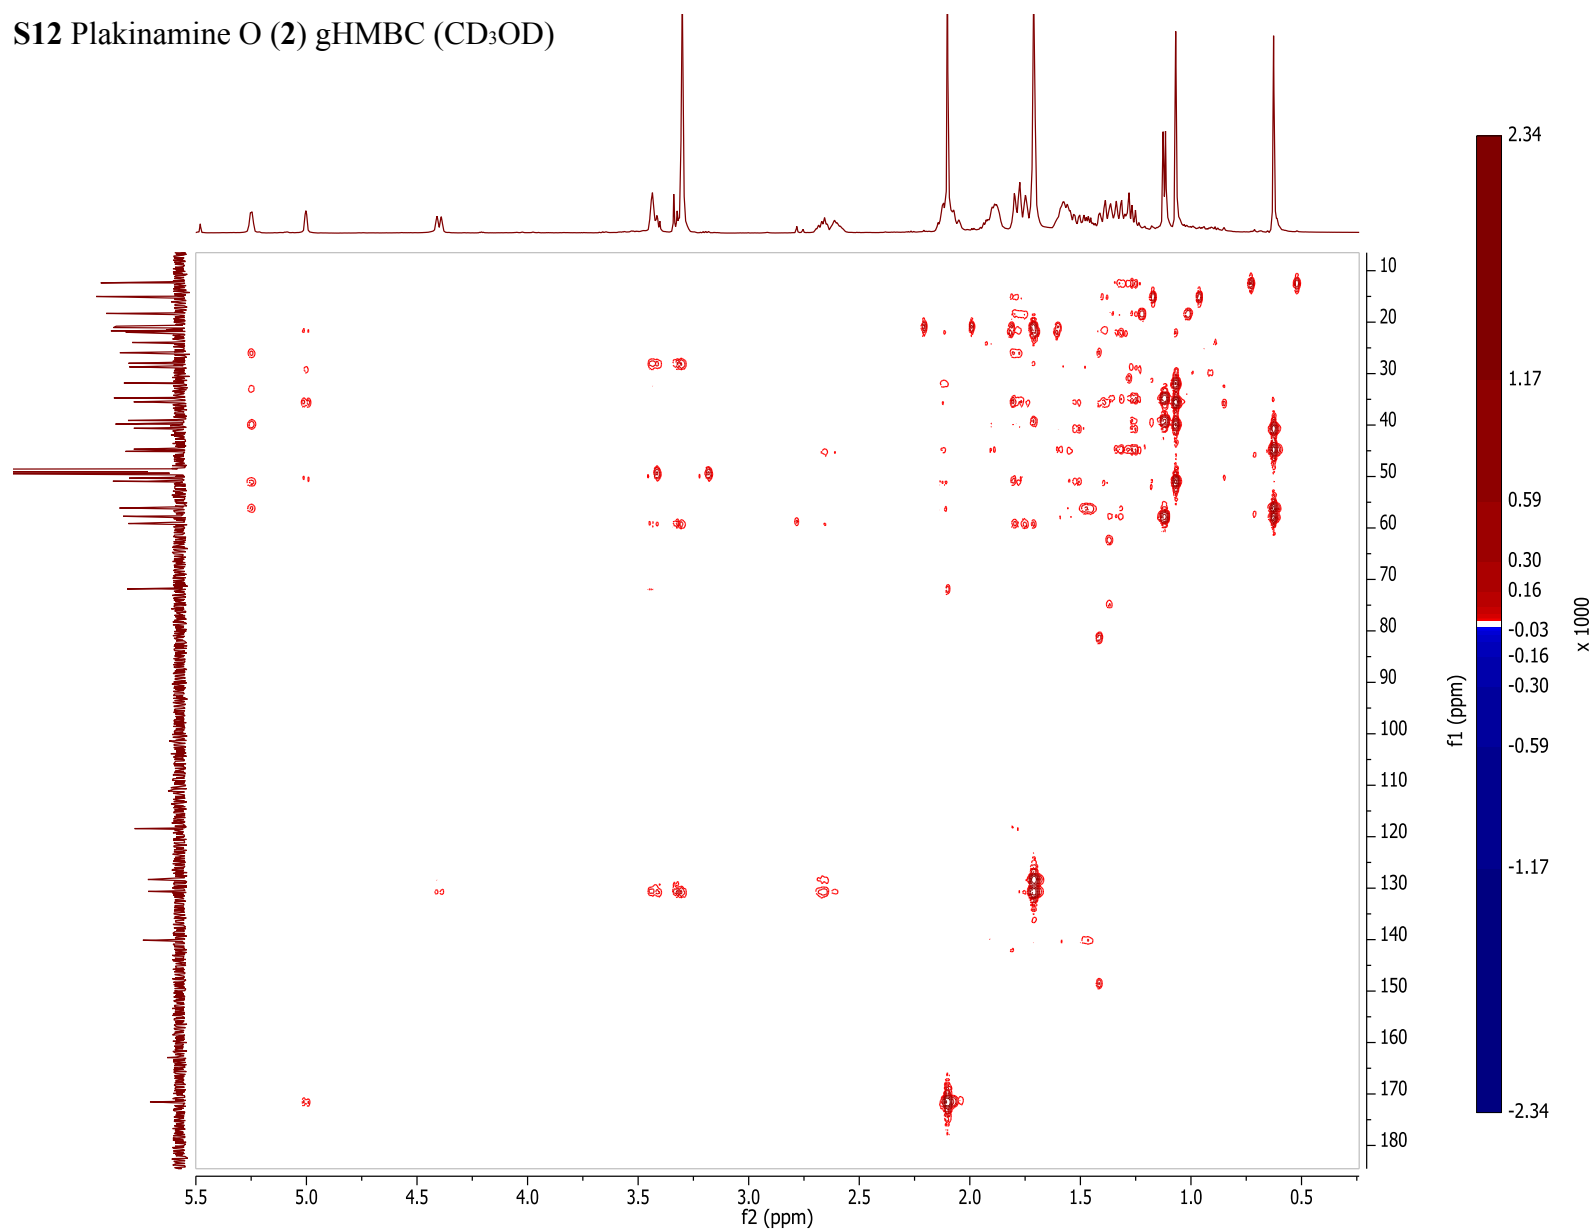

S13 Plakinamine O (2) ROESY (CD<sub>3</sub>OD)

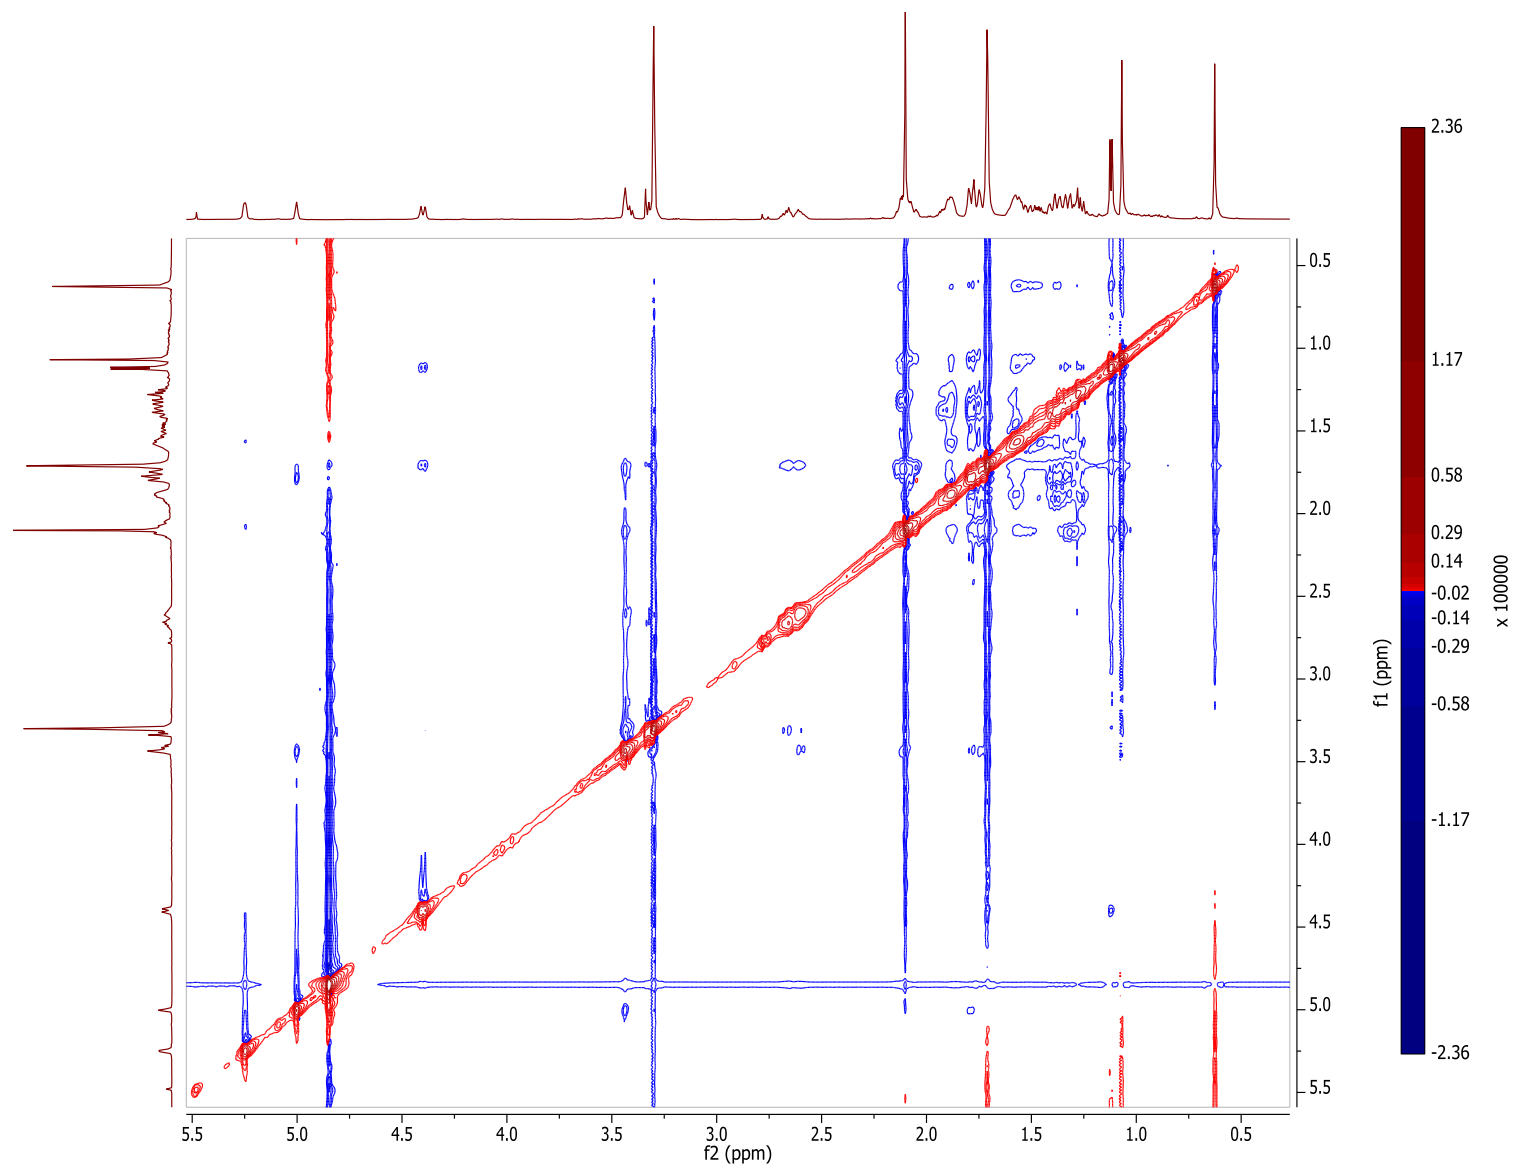

# S14 Plakinamine O (2) HRESIMS (+)

## MS Formula Results: + Scan (3.356 min) (155A125B.d)

| m/z      | Ion                | Formula                                                       | Abundance |
|----------|--------------------|---------------------------------------------------------------|-----------|
| 483.3952 | (M+H) <sup>+</sup> | C <sub>31</sub> H <sub>51</sub> N <sub>2</sub> O <sub>2</sub> | 379393.1  |

  

| Best                                | Formula (M)                                                     | Ion Formula                                                     | Score | Cross Score | Calc m/z | Diff (ppm) | Mass Match | Abund Match | Spacing Match |
|-------------------------------------|-----------------------------------------------------------------|-----------------------------------------------------------------|-------|-------------|----------|------------|------------|-------------|---------------|
| <input checked="" type="checkbox"/> | C <sub>31</sub> H <sub>50</sub> N <sub>2</sub> O <sub>2</sub>   | C <sub>31</sub> H <sub>51</sub> N <sub>2</sub> O <sub>2</sub>   | 98.22 |             | 483.3945 | -1.35      | 98.09      | 97.46       | 99.37         |
| <input type="checkbox"/>            | C <sub>24</sub> H <sub>50</sub> N <sub>8</sub> S                | C <sub>24</sub> H <sub>51</sub> N <sub>8</sub> S                | 93.05 |             | 483.3952 | 0.02       | 100        | 85.45       | 88.28         |
| <input type="checkbox"/>            | C <sub>27</sub> H <sub>46</sub> N <sub>8</sub>                  | C <sub>27</sub> H <sub>47</sub> N <sub>8</sub>                  | 80.79 |             | 483.3918 | -6.95      | 60.2       | 99.51       | 99.53         |
| <input type="checkbox"/>            | C <sub>28</sub> H <sub>54</sub> N <sub>2</sub> O <sub>2</sub> S | C <sub>28</sub> H <sub>55</sub> N <sub>2</sub> O <sub>2</sub> S | 80.53 |             | 483.3979 | 5.62       | 71.73      | 85.03       | 92.72         |

## User Spectra

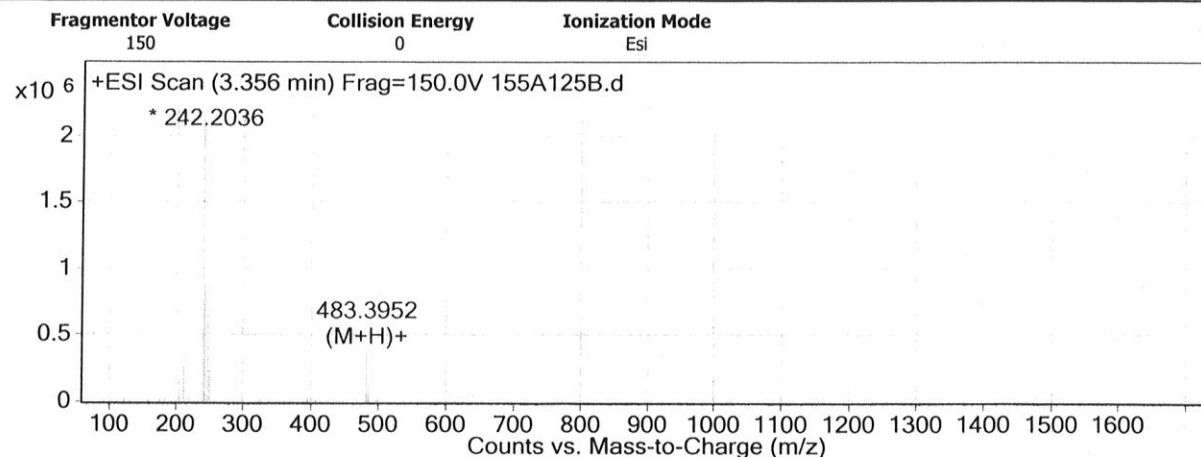

# S15 Plakinamine N (1), NSC 775605: NCI-60 mean bar graphs

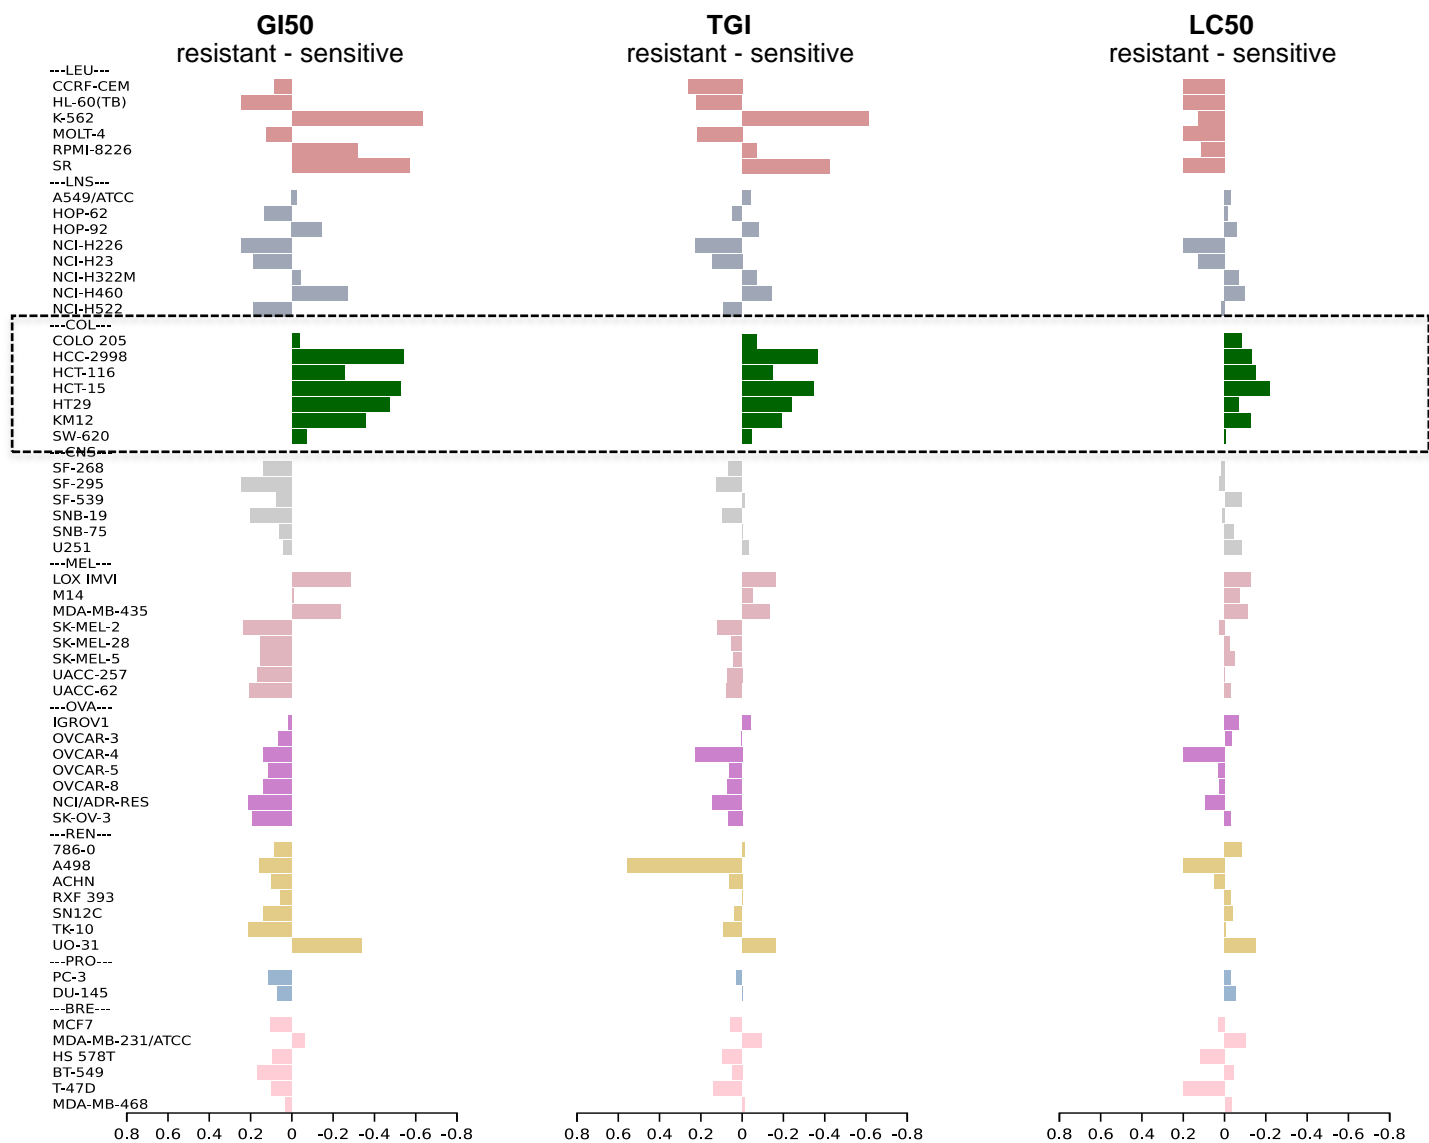



# S16 Plakinamine O (2), NSC 775606: NCI-60 mean bar graphs

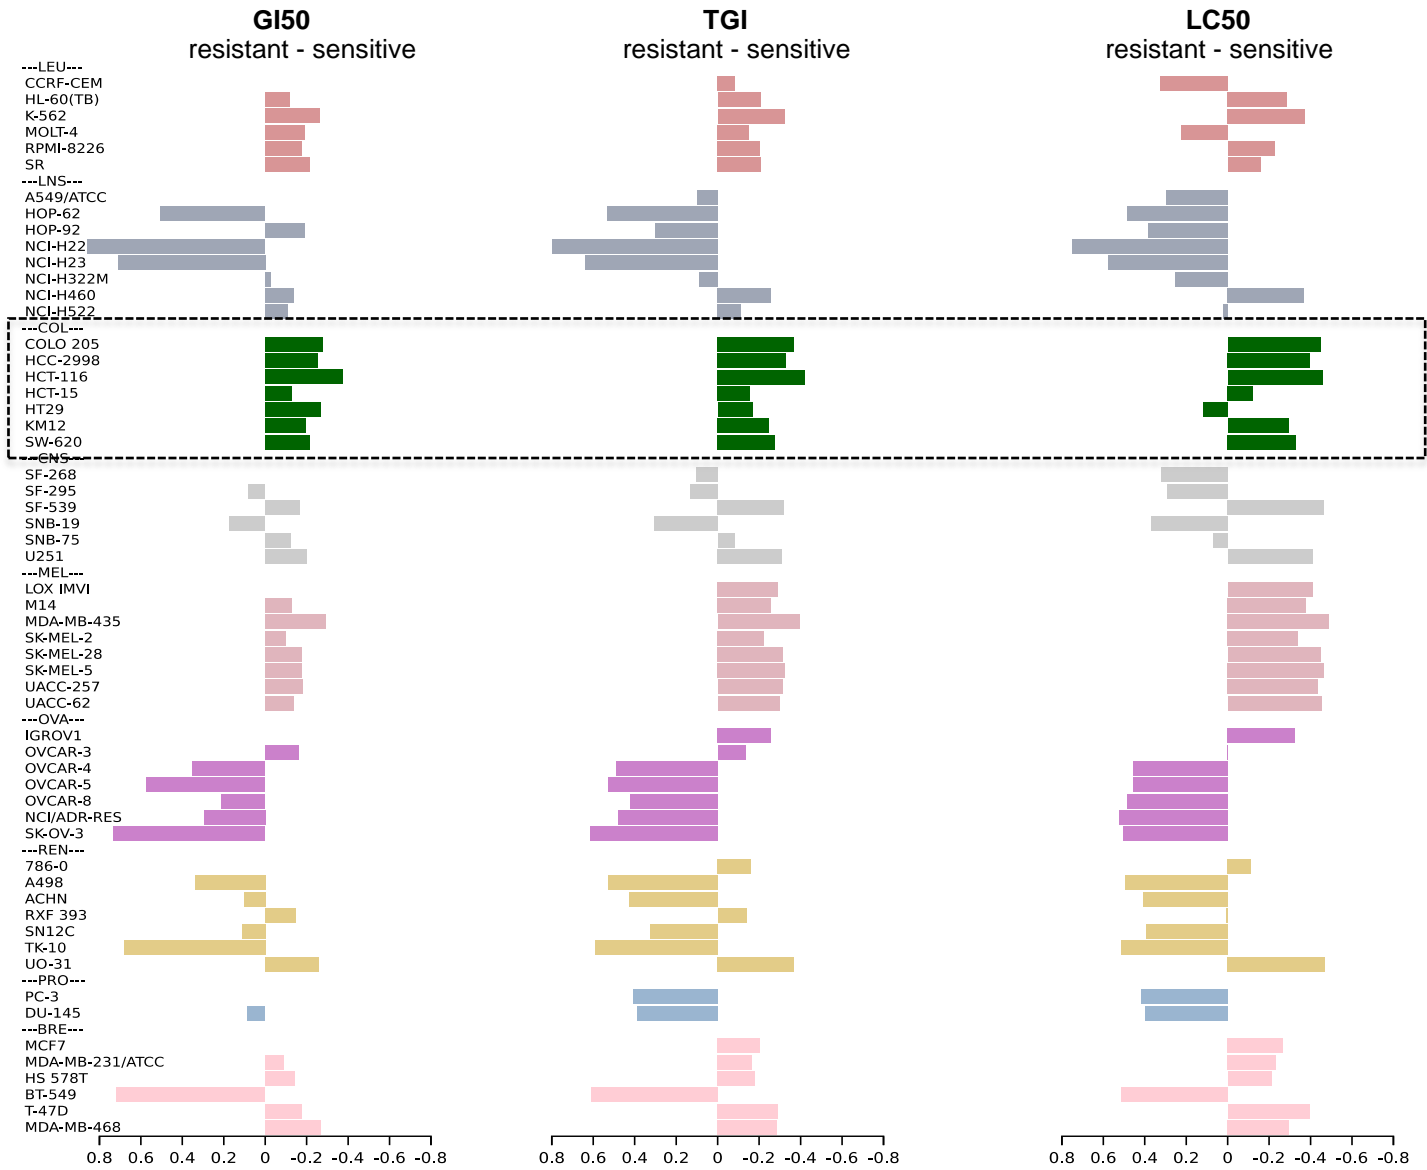

# S17 Plakinamine J (4), NSC 775603: NCI-60 mean bar graphs

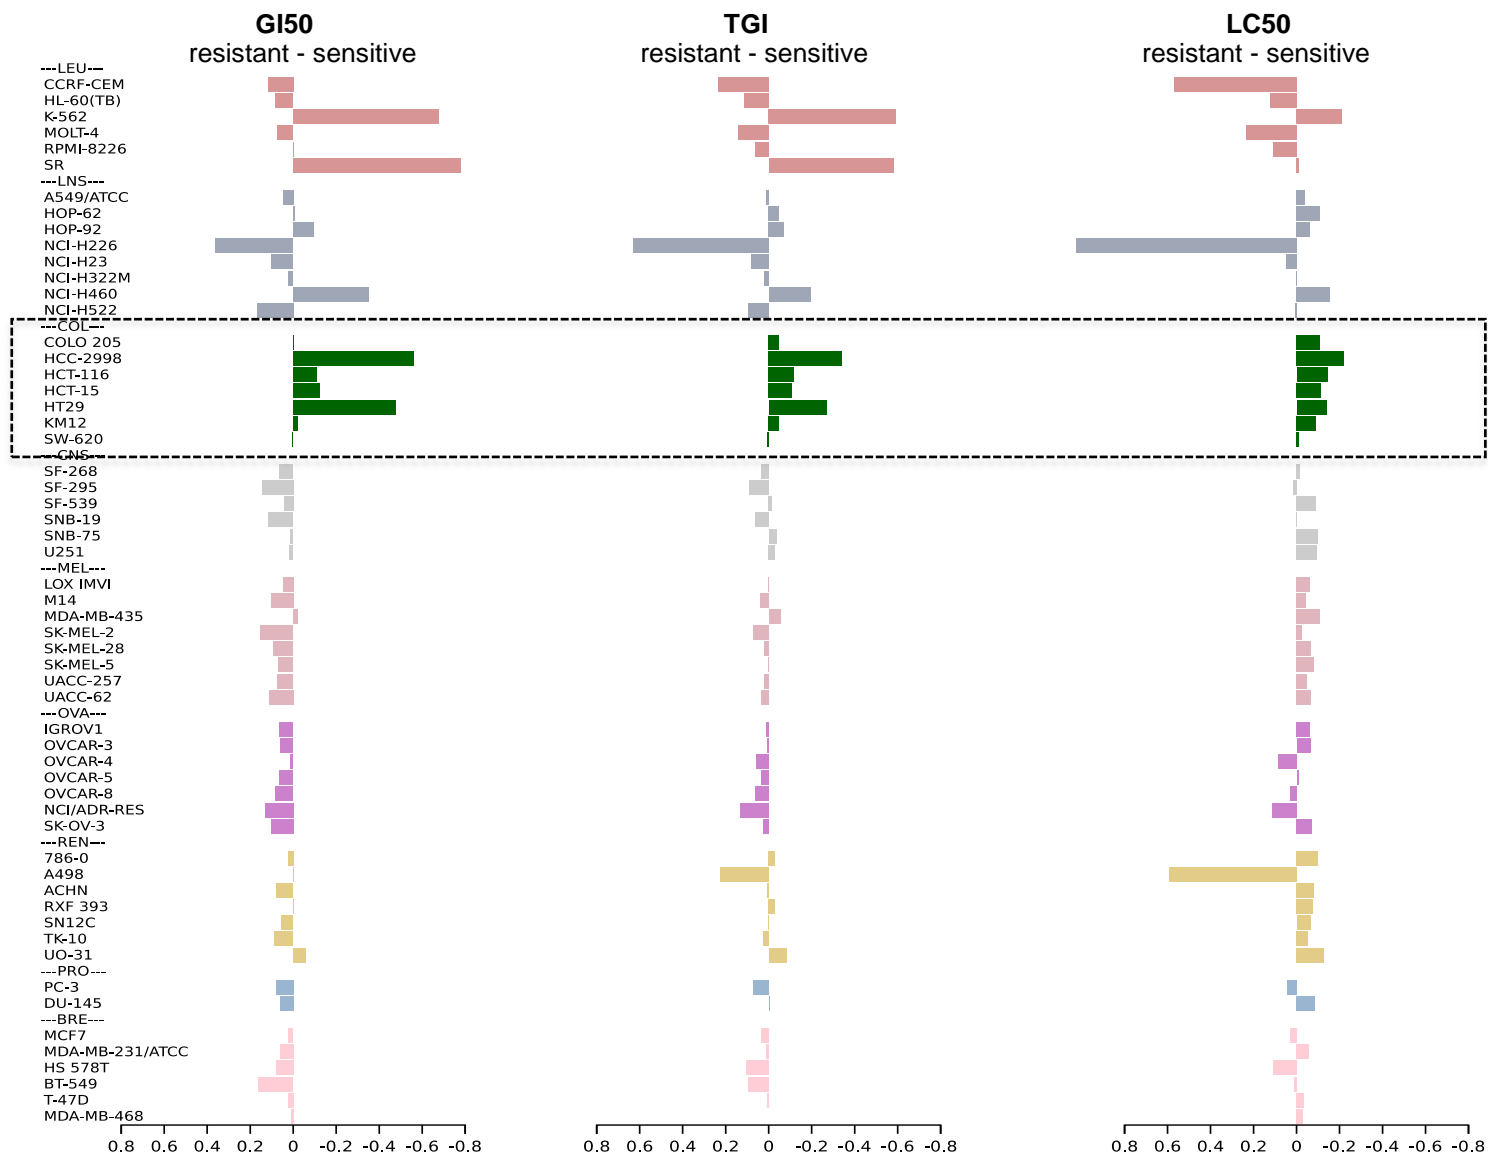

Supplement: np500556t_si_001.pdf [file np500556t_si_001.pdf]
